# Supplementary material for: Population Structure and Genetic Diversity Analyses Provide New Insight into the Endemic Species Aster spathulifolius Maxim. and Its Evolutionary History
Source: MDPI journal article supplement (doi:10.3390/plants13010088), 2023-12-27
Supplement: s1 [file s1]

**Supplementary Table S2:** Isolation sites and geographical locations of *Aster spathulifolius*.

| Sl. No.      | Population                                                         | Geographical Location | Abbreviation | Sample size |
|--------------|--------------------------------------------------------------------|-----------------------|--------------|-------------|
| <b>Korea</b> |                                                                    |                       |              |             |
| 1.           | Anmyeon Island, Chungcheongnam-do, South Korea                     | 36°29'N, 126°20'E     | AN           | 5           |
| 2.           | Busan, South Korea                                                 | 35°07'N, 129°07'E     | BS           | 5           |
| 3.           | Byeonsan, Jeollabuk-do, Korea                                      | 35°37'N, 126°28'E     | BY           | 5           |
| 4.           | Dokdo Island site I, Dongdo, Gyeongsangbuk-do, South Korea         | 37°14'N, 131°52'E     | DDI          | 5           |
| 5.           | Dokdo Island site II, Dongdo, Gyeongsangbuk-do, South Korea        | 37°14'N, 131°51'E     | DDII         | 5           |
| 6.           | Goeje Island, Gyeongsangnam-do, South Korea                        | 34°44'N, 128°39'E     | GJ           | 5           |
| 7.           | Jeju Island site I, Jeju-do, South Korea                           | 33°30'N, 126°54'E     | JJI          | 5           |
| 8.           | Jeju Island site II, Seogwipo, JeJu-do, South Korea                | 33°16'N, 126°42'E     | JJII         | 5           |
| 9.           | Pohang, Gyeongsangbuk-do, South Korea                              | 36°04'N, 129°22'E     | PH           | 5           |
| 10.          | Ulleung Island site I, Sadong-ri, Gyeongsangbuk-do, South Korea    | 37°27'N, 130°52'E     | ULI          | 5           |
| 11.          | Ulleung Island site II, Hyeongpo-ri, Gyeongsangbuk-do, South Korea | 37°31'N, 130°49'E     | ULII         | 5           |
| 12.          | Yangyang, Gangwon-do, South Korea                                  | 38°03'N, 128°40'E     | YY           | 5           |
| <b>Japan</b> |                                                                    |                       |              |             |
| 13.          | Munakata, Fukuoka, Japan                                           | 33°53'N, 130°32'E     | JPI          | 5           |
| 14.          | Kita-Nagato coast quasi National Park, Yamaguchi, Japan            | 34°26'N, 131°25'E     | JPII         | 5           |
| 15.          | Oki Island, Shimane, Japan                                         | 36°25'N, 133°24'E     | OKI          | 5           |
