# Supplementary material for: Population Structure and Genetic Diversity Analyses Provide New Insight into the Endemic Species Aster spathulifolius Maxim. and Its Evolutionary History
Source: MDPI journal article supplement (doi:10.3390/plants13010088), 2023-12-27
Supplement: s1 [file s1]

**Supplementary Table S1:** The efficient allelic number (Ne), observed heterozygosity (Ho), expected heterozygosity (He), polymorphism information content (PIC) and gene flow of *A. spathulifolius* populations.

| Sl. No.  | Population | Na   | Ne   | Ho    | He       | PIC       | $F_{ST}$ | Nm       |
|----------|------------|------|------|-------|----------|-----------|----------|----------|
| 1.       | AN         | 2    | 0.5  | 1     | 0.32     | 0.4352    | 0.97368  | 0.006407 |
| 2.       | BS         | 0    | 0    | 0     | 0        | 0         | 1        | 0        |
| 3.       | BY         | 2    | 0.5  | 1     | 0.32     | 0.4352    | 0.84210  | 0.033242 |
| 4.       | GJ         | 2    | 0.5  | 1     | 0.32     | 0.4352    | 0.97368  | 0.006407 |
| 5.       | PH         | 2    | 0.5  | 1     | 0.4      | 0.4672    | 0.94738  | 0.012463 |
| 6.       | YY         | 2    | 0.5  | 1     | 0.32     | 0.4352    | 0.86842  | 0.028567 |
| 7.       | JJI        | 0    | 0    | 0     | 0        | 0         | 0.97368  | 0.006407 |
| 8.       | JJII       | 0    | 0    | 0     | 0        | 0         | 1        | 0        |
| 9.       | DDI        | 0    | 0    | 0     | 0        | 0         | 1        | 0        |
| 10.      | DDII       | 2    | 0.5  | 1     | 0.48     | 0.4992    | 0.97368  | 0.006407 |
| 11.      | ULI        | 2    | 0.5  | 1     | 0.32     | 0.4352    | 0.94738  | 0.012463 |
| 12.      | ULII       | 2    | 0.5  | 1     | 0.32     | 0.4352    | 0.97368  | 0.006407 |
| 13.      | OKI        | 2    | 0.5  | 1     | 0.32     | 0.4352    | 0.97368  | 0.006407 |
| 14.      | JPI        | 2    | 0.5  | 1     | 0.32     | 0.4352    | 0.94738  | 0.012463 |
| 15.      | JPII       | 0    | 0    | 0     | 0        | 0         | 0.97368  | 0.006407 |
| Average  |            | 1.33 | 0.33 | 0.666 | 0.22933  | 0.29653   | 0.95789  | 0.0096   |
| Mainland |            | 2    | 0.5  | 1     | 0.181125 | 0.2565403 | 0.5      | 0.0625   |
| Island   |            | 2    | 0.5  | 1     | 0.276044 | 0.3555438 | 0.63157  | 0.058172 |

Mean number of alleles (Na); Effective number of alleles (Ne); Observed heterozygosity (Ho); Expected heterozygosity (He); Polymorphism Information Content (PIC);  $F_{ST}$  = (Variation between populations – variation within populations)/variation between populations; Nm gene flow =  $(1-F_{ST})/4F_{ST}$
