# Supplementary material for: Population Structure and Genetic Diversity Analyses Provide New Insight into the Endemic Species Aster spathulifolius Maxim. and Its Evolutionary History
Source: MDPI journal article supplement (doi:10.3390/plants13010088), 2023-12-27
Supplement: s1 [file s1]

**Supplementary Table S3** Primers and amplification conditions used in the study.

| Gene-specific primer name                              | Gene-specific primer sequence | Amplification conditions                                                                                                              |
|--------------------------------------------------------|-------------------------------|---------------------------------------------------------------------------------------------------------------------------------------|
| <i>rbcl</i>                                            |                               |                                                                                                                                       |
| 71F                                                    | 5'-TGCCAAGCCTCGCT CCAA-3'     | Initial denaturation 94°C for 5 min, 30 cycles of 94°C for 40 s, 52°C for 40 s, and 72°C for 60 s. Final extension at 72°C for 5 min. |
| 1379R                                                  | 5'-CGCGTTGTTCTCGTTCAT-3'      |                                                                                                                                       |
| <i>matK</i>                                            |                               |                                                                                                                                       |
| 427F                                                   | 5'-CGCACGGATCCTTTCAGAATGTC-3' | Initial denaturation 94°C for 5 min, 30 cycles of 94°C for 40 s, 54°C for 40 s, and 72°C for 60 s. Final extension at 72°C for 5 min. |
| 1248R                                                  | 5'-GCCACGCCAAGCTTCACGCTCA-3'  |                                                                                                                                       |
| <i>rpoC1</i>                                           |                               |                                                                                                                                       |
| <i>rpoC1F</i>                                          | 5'-GAGGACGTCGAAGACCACCA-3'    | Initial denaturation 94°C for 5 min, 30 cycles of 94°C for 30 s, 52°C for 40 s, and 72°C for 60 s. Final extension at 72°C for 5 min. |
| <i>rpoC1R</i>                                          | 5'-ACC GCAGCATCGTGTATGAG-3'   |                                                                                                                                       |
| <i>ndhF</i>                                            |                               |                                                                                                                                       |
| <i>ndh1F</i>                                           | 5'-CGGAGCATGGACCCCCAGC-3'     | Initial denaturation 94°C for 5 min, 30 cycles of 94°C for 30 s, 48°C for 40 s, and 72°C for 60 s. Final extension at 72°C for 5 min. |
| <i>ndh1R</i>                                           | 5'-GTGCCCCGATATTGGTCACCGAG-3' |                                                                                                                                       |
| <i>ndh2F</i>                                           |                               |                                                                                                                                       |
| <i>ndh2R</i>                                           | 5'-GTGTTCTTCGACTTCCTCG-3'     | Initial denaturation 94°C for 5 min, 30 cycles of 94°C for 40 s, 51°C for 40 s, and 72°C for 60 s. Final extension at 72°C for 5 min. |
|                                                        | 5'-TGCCGGTTCGCGAGCCAG-3'      |                                                                                                                                       |
| <i>ndh3F</i>                                           |                               |                                                                                                                                       |
| <i>ndh3R</i>                                           | 5'-GTGTTCTTCGACTTCCTCG-3'     | Initial denaturation 94°C for 5 min, 30 cycles of 94°C for 40 s, 52°C for 40 s, and 72°C for 60 s. Final extension at 72°C for 5 min. |
|                                                        | 5'-TGCCGGTTCGCGAGCCAG-3'      |                                                                                                                                       |
| Internal Transcribed spacer (ITS1, 5.8S rRNA and ITS2) |                               |                                                                                                                                       |
| ITS4                                                   | 5'-TCCTCCGCCTTATTGATATGC-3'   | Initial denaturation 94°C for 5 min, 30 cycles of 94°C for 40 s, 56°C for 40 s, and 72°C for 60 s. Final extension at 72°C for 5 min. |
| ITS5                                                   | 5'-GGAAGTAAAAGTCGTAACAAGG-3'  |                                                                                                                                       |
